# Supplementary material for: Critical multi-stranded approach for determining the ecological values of diatoms in unique aquatic ecosystems of anthropogenic origin
Source: PeerJ. 2019 Dec 5;7:e8117. doi: 10.7717/peerj.8117 (PMC6899344; doi:10.7717/peerj.8117)
Supplement: Supplemental Information 5 — Number—numbers of valves in the samples, "+"—less than 3 valves in the sample, N/A—not analyzed [file peerj-07-8117-s005.xlsx]

## Sheet: Raw data
Number - numbers of valves in the samples "+" - les than 3 valves in the sample N/A - not analysed	CODE	D.PEPB.040713	D.PEPB.301113	D.PEPB.190214	D.PEPB.250314	D.PEDB.040713	D.PEDB.301113	D.PEDB.190214	D.PEDB.250314	D.PESB.040713	D.PESB.301113	D.PESB.190214	D.PESB.250314	D.LEP1.250314	D.LEP2.250314	D.LEP3.250314	D.LEP1.260714	D.LEP2.260714	D.LEP3.260714	D.LEP1.011014	D.LEP2.011014	D.LEP3.011014	D.LEP1.031214	D.LEP2.031214	D.LEP3.031214	D.LEP1.250315	D.LEP2.250315	D.LEP3.250315	D.LEP1.300615	D.LEP2.300615	D.LEP3.300615	D.LEP1.041115	D.LEP2.041115	D.LEP3.041115	D.LEP1.101215	D.LEP2.101215	D.LEP3.101215	D.BOZB.250315	D.BOZB.300615	D.BOZB.041115	D.BOZB.101215	D.BOZB.210316	D.BOZB.220616	D.BOZB.261016	D.BOZB.091216
Achnanthes brevipes	ABRE					+	+	3	+	6	4	7	+
Achnanthidium affine	ACAF																							+
Achnanthidium exiguum	ADEG																		+	+		+									+
Achnanthidium kranzii	ADKR																								+
Achnanthidium minutissimum	ADMI	5	8	7							3	+		+	55	8	6	66	5	12	34	4	+	35	+	20	216	3	13	49	10		13	5		26	3	72	15	3	14	360	27	12	102
Achnanthidium neomicrocephalum	ADNM																																					15	5	5		+	14	+	27
Achnanthidium saprophilum	ADSA															+
Amphipleura pellucida	APEL																																					+		29	5	3		+	+
Amphora cf. neglecta f. densestriata	AcfNDE														+									3	+					+		+	+	+	+
Amphora cf. parallerlisteriata var. manguinii	AcfMPM													+
Amphora cf. vetula DE 5 P54 F12-13	AcfVTU																										+			+		+	+			19
Amphora copulata	ACOP													5	+			+			7	+	22	13		+	+	+	+	+	+	+	+		+	9	+
Amphora inariensis	AINA																+	+			+	6					+	4	+	+	7		+	+	+	3	+					+			+
Amphora indistincta	AMID															4	+			5																	+	+					3	+
Amphora lange-bertalotii	AMLB																																					+		+			+
Amphora lange-bertalotii var. tenuis	ALGT													+											+							+	+	+	+	+
Amphora macedoniensis	AMCD																																						+
Amphora minutissima	AMNU													+	+											+		+		+
Amphora ohridana	AMOH																+				+		+						+	+		+	+									+		+
Amphora ovalis	AOVA													+				+
Amphora ovalis var. tenuis	AOLT													+
Amphora pediculus	APED		+							+					22	19	3	11	8	20	24	7	4	78	+	5	6	5	5	30	23	+	17	9	+	28	4	8	+	+	+	+	+	5
Amphora affinis	AAFI																												+
Aneumastus balticus	ABLT																																					3	4	+	4	6	16	6	+
Aneumastus cf. rosettae	ANcfRO																																								+		+
Aneumastus laetus	ALTU																																							+			+
Aneumastus pseudotusculus	ANPT																																					+
Aneumastus rostratus	ANRO																																					+	3	+	+		+	+
Aneumastus stroesei	ANRO																																					5	6	+	10	+	6		+
Aneumastus tusculus	ANTU																																									+
Anomoeoneis sphaerophora	ASPH	+	+	+				+		+	4									+		3			+			+		+	+			+			+
Anomoeoneis sphaerophora f. sculpta	ASSC				+
Asterionella formosa	AFOR																																					9		4	+	+	28	+	+
Aulacoseira pseudomuzzanensis	APMU													33	27	11	40	10	12	8	19	18	21	12	4	6	8	10	8	7	8	9	21	15	+	13	+
Brachysira microcephala	BMIC																																											+
Caloneis alpestris	CAPS																																					+			+			+	+
Caloneis amphisbaena	CAMP													+			3						+			3			+			+						+		+	+	+	+		+
Caloneis bacillum	CBAC													+												+										+		+
Caloneis biconstrictoides	CBCT																																					+
Caloneis cf. leptosoma	CAcfLE																																					+	+	+	+	+	3	+	+
Caloneis cf. meridionalis	CcfMER																																						+	+	8	+	+	+	+
Caloneis cf. silicula	CcfSIL																																								+
Caloneis cf. thermalis	CcfTHE																																					+				+
Caloneis fontinalis	CFON																																								+	+	+		+
Caloneis lancettula	CLCT														+
Caloneis schumanniana var. biconstricta	CSBI																																								+
Caloneis silicula	CSIL													+			+								+	+					+		+	+							+	4	+	+
Caloneis silicula var. gibberula	CSGB																																						+	+
Caloneis sp. 1	CSP1																																					+	+		5
Caloneis sp. 163/2-6 ID 5	CID5																																					+
Caloneis sp. 2	CSP2																																							+
Caloneis sp. 3	CSP3																																							+
Chamaepinnularia krookiformis	CHKF							30	55	+			3
Chamaepinnularia plinskii	CHPL		+			27		32	45	6	6	20
Cocconeis neothumensis	CNTH																				+									+			5			+		59	9	9	5	3	7	31	+
Cocconeis pediculus	CPED	4												28	+				+	+	+		+	+		+	+		+	9	6		+			+	+	+	+	+
Cocconeis placentula	CPLA	44	39	27	4			4		+
Cocconeis placentula var. lineata	CLNT													+	3	8	7	4	4	+	6	6	10	23		+	3	5	8	10	21	+	9	3	+	14	+	7	+	+	5	+		+	+
Cocconeis pseudothumensis	COPS									3
Craticula ambigua	CAMB									+					+				+												+	+		+
Craticula buderi	CRBU	32	61	47	50	+	+	+		3	5	+									+					4								+	4		+
Craticula cuspidata	CRCU		+											+						+		+	+		+			+						7			8
Craticula halophila	CHAL				+	3	6	4	75	11	5	29	9																											+		+		+
Ctenophora pulchella	CTPU	+	+					+		5		3	4
Cyclostephanos dubius	CDUB	+	+											70	172	60	245	376	154	145	268	93	218	195	40	49	56	72	300	359	178	220	254	31	76	324	17
Cyclostephanos invisitatus	CINV													34	27	31	17	3	31	72	8	50	21	4	15	+	+	14	9	+	17	52	22	7	202	+	5				+
Cyclotella meneghiniana	CMEN	7	22	7	5									3	6	26	9	+	43	28	15	33	23	22	31		+	21	6	5	32	55	59	44	69	7	6			+				+	+
Cymatopleura elliptica	CELL													+																													+
Cymatopleura solea	CSOL													+					3			+	+		+	+		+			+		+	3			+			+		+
Cymbella aspera	CASP																				+			+
Cymbella compacta	CCMP																											+
Cymbella cymbiformis	CCYM													3
Cymbella dorsenotata	CDNO																																									+			+
Cymbella excisa	CAEX																																						+	14	4	+		+	+
Cymbella excisiformis	CAEX																									+
Cymbella helvetica	CHEL																							+																	+		+		+
Cymbella lanceolata	CLAN													+									+
Cymbella lange-bertalotii	CLBE																																					+	+	+		+
Cymbella neocistula	CNCI																			+			+			+	3		+					+				+	+	6	6	4		+
Cymbella sp. 1	CSP1																																							+
Cymbella subleptoceros	CSLP														+
Cymbella vulgata	CVUL																																					+
Cymbopleura amphicephala	CBAM																																					+				+
Cymbopleura cf. subaequalis	CcfSAQ																																											+
Cymbopleura frequens	CBFQ																																					3	8	+	+	6	+	+	+
Cymbopleura lata	CYBL																																						+	+	+	+	+	+	+
Denticula subtilis	DSUB					+	+	3		8		4	3																															+
Diatoma moniliformis	DMOF																									+	+											3		+	5	7	+	+	160
Diatoma tenuis	DITE		+		+							+	+		+	+	+	+						3		+	9		+	+	+	+	+			+	+	3			+	6	+		+
Diploneis cf. parahinziae	DPHI																																								+	+
Diploneis cf. separanda	DcfSEP																																					+	+	+	5	+	+	+	+
Diploneis cf. smithii	DcfSMI												+
Diploneis interrupta	DINT					+		8			26	5	4
Diploneis krammeri	DKRA							+			3	+																										+	+	+	+	+	+		+
Diploneis oculata	DOCU																																					+	+		4		+
Diploneis separanda	DSEP																																					+	+	+		+		+
Discostella pseudostelligera	DPST													+	12	5	8	+	4		5	5	8	9	+	+	6	+	+	4			2	1	1	1							4
Discostella stelligera	DSTE																						+									6
Discostella woltereckii	DWOL														25	5	+	6	+		+	5	28	15	+	+	+	15	5	5	+	15	85	2	25	1	5
Encyonema aequilongum	EAEQ																																					+	+	+			+	+
Encyonema cespitosum var. cespitosum	ECAS													+		+		+						3			+	+	+	+	5		+			+	+								7
Encyonema cespitosum var. comensis	ECCO																																										+
Encyonema lange-bertalotii	ENLB																																									+
Encyonema minutum	ENMI																			8														+
Encyonema prostratum	EPRO													+							+			+						+						+
Encyonema silesiacum	ESLE											+		4	3		+	+																	+
Encyonema ventricosum	EVET														8	+							+	4	+	+	6		+	+		+	+	+		+									+
Encyonopsis minuta	ECPM																																					5	+	+	4		+	+	+
Encyonopsis subminuta	ESUM																																					13	6	83	9	10	17	24	24
Entomoneis paludosa	EPAL	+
Eolimna cf. minima	EOcfMI				5
Eolimna cf. tantula	EcfTAN		6
Eolimna minima	EOMI													+
Eolimna subminuscula	ESBM															+
Epithemia frickei	EFRI													+
Epithemia adnata	EADN																																	+				+	+		+				+
Epithemia smithii	ESMI																																					+					+
Epithemia sorex	ESOR																		4	+		+									20			7			3		+	+				+
Epithemia sorex var. gracilis	ESGR																																					+			+
Epithemia turgida	ETUR																																						+				+		+
Epithemia turgida var. granulata	ETGR																																									+
Eucocconeis flexella	EUFL																																					+	+	+	+	+		+	+
Eucocconeis laevis	ELEA																																					63	3		+	13	+	8	+
Eunotia bilunaris	EBIL													+		+	+									+			+	+
Fallacia monoculata	FMOC					+	5	+	+		+	+	3		+					+		+			+						+						+
Fallacia pygmaea	FPYG	+	+	+	+					+		+	+							+
Fallacia sublucidula	FSLU	4		3			+				6
Fistulifera pelliculosa	FPEL															+
Fragilaria binodis	FBNB	+
Fragilaria capucina	FCAP																									14	+					+						+		+		+		12	7
Fragilaria capucina var. perminuta	FCPE																																												10
Fragilaria construens	FCON									6											+						+				+								+		+
Fragilaria dilatata	FDIL																																						+	+		+		+	+
Fragilaria famelica	FFAM	+			+	7	5	8	5	+	7	9	74
Fragilaria gracilis	FGRA																																					+				9
Fragilaria leptostauron	FLEP																																								+
Fragilaria mesolepta	FMES													+	+	+	+	+			+					+	5			+						+									+
Fragilaria parasitica	FPAR																																							+	6		+		+
Fragilaria parasitica var. subconstricta	FPSC													6	+	+	+	+	+	+	+		+	+	+	+		+	+	+	+	+		+	+	+	+
Fragilaria perminuta	FPEM																+																					+
Fragilaria radians	FRAD													20	11	6	15	3		+	+	+	+	9		50	53		+	4	+	+	+	+	+	4	+	7	+	+	+	+	+	3	22
Fragilaria rumpens	FRUM																									+
Fragilaria sopotensis	FSOP	+	59	27	3					+	+
Fragilaria subsalina	FSSA	72				+				40		+
Fragilaria tenera	FTEN																																					50	+	+	4	6	+		+
Fragilaria vaucheriae	FVAU				+				+					9	34	5	8	8	+		+		4	8	+	18	41		7	+		+			+	+
Frustulia creuzburgensis	FCRE									3	+		+
Frustulia vulgaris	FVUL																							+			+								+	+
Geissleria decussis	GDEC																																					+	+	+	3		3
Gomphonema acidoclinatum	GADC						+															+
Gomphonema acuminatum	GACU														+			+					+							+		+				+						+			+
Gomphonema angustatum	GANT															+
Gomphonema capitatum	GCAP																+
Gomphonema exilissimum	GEXL		+																																								+
Gomphonema gracile	GGRA														+														+								+
Gomphonema italicum	GITA		+
Gomphonema micropus	GMIC													+		+	+	+	+	+		+	+	+			+		+						+	+
Gomphonema minusculum	GMIS																													+
Gomphonema minutum	GMIN														+									+		+			+										+		+	+
Gomphonema olivaceum	GOLI														+	+		+								4	12		+	+	+		+	+	+	+			+			+			+
Gomphonema pala	GOPA			+				+				+		3	+	+					+		+	+		+	+		+	+	+		+	+		+
Gomphonema parvulum	GPAR	8	+	114	50		+	11	9	6	+	7	+
Gomphonema parvulum var. parvulum	GPPA													+	+	4	+	3		+	+	+	+	4	+	+	8	3	+	+	4	+	3	+	+	6	+
Gomphonema pseudoaugur	GPSA																													+
Gomphonema pumilum	GPUM																				+			+									+								+
Gomphonema sp. 1	Gsp1																																									+			98
Gomphonema subclavatum	GSCL		+		+																		+			+													+
Gomphonema truncatum	GTRU													+
Gomphonema utae	GUTA	+	5		+	+	+
Gomphonema vibrio	GVIB																																						+
Gyrosigma acuminatum	GYAC												+	+	+		+	+		+				4		+	+		+	+						+
Gyrosigma attenuatum	GYAT																																					+			+	+		+	+
Gyrosigma kuetzingii	GYKU											+
Halamphora acutiuscula	HLAC							+		3	11	5	+
Halamphora aponina	HLAP										+	+
Halamphora borealis	HABO										+		11
Halamphora oligotraphenta	HADT																																						12	+	+		+	+	+
Halamphora dominici	HDOM	5	7	11	20	+			+		+	3
Halamphora luciae	HLUC							+			27
Halamphora montana	HLMO																			3		4		+				+										+
Halamphora sp. 2	HSP2													+	+		+										+		+						+
Halamphora sydowii	HSYD											4
Halamphora tenerrima	HTNR										+		3
Halamphora veneta	HVEN		+		8											+	+	+		+					+			+	+	+	+		+		+		+
Hantzschia abundans	HABU	+				+	9	27	5	3	+	5	4
Hantzschia amphioxys	HAAM	4	+	+	+	+			+				+					+				+												+			+
Hantzschia calcifuga	HCAL								+																							+
Hantzschia spectabilis	HSPE		+																															+
Hippodonta capitata	HCAP													29	+	4	27	3	5	+	+	6	33	3	+	23	+	5	25	+	21	+	+	+	+	+	8			+		+		+	+
Hippodonta hungarica	HHUN	+	31	5	46		+	+		+		5
Karayevia clevei	KCLE										+																									+
Karayevia kolbei	KAKO														+									+																					+
Karayevia ploenensis	KAPL										+										+								+				+
Karayevia ploenensis var. gessneri	KAPG																																					+						+
Lemnicola hungarica	LHUN		+	+										+	+	+	+	+	+	+		+	+	+	+			3	+		+	+	+	+	+
Lindavia first division cell	Lkpp																																						+	+	+	+	15	+
Lindavia balatonis	LBAL													3	4		+	+			5	+	3	+		+	+		+	+		+	8		+	3
Lindavia radiosa	LRAD																																									+	11	+	+
Lindavia sp. 1	Lsp1																																					5	5	+	+	+	+	+
Luticola cf. mutica	LcfMUT					+	+
Luticola goeppertiana	LGOP					+	+
Luticola mutica	LMUT	3							+	+	+	+																									+
Luticola nivalis	LNIV																	+
Luticola paramutica	LPAR													+																					+
Luticola pseudonivalis	LPNI																								+
Luticola sp. 1	LUSP1											+
Luticola ventricosa	LVEN											+
Mastogloia baltica	MBAL																																												+
Mastogloia elliptica	MELL									+		+
Mastogloia lacustris	MLAC																																						+	+		+		+	+
Mastogloia smithii	MSMI									+	+	+	+																									4	121	19	22	+	28	84	3
Mayamaea atomus	MAAT																																				+
Mayamaea atomus var. permitis	MAPE					+	+		5				+																														+
Mayamaea lacunolaciniata	MLLC					8
Melosira varians	MVAR														+		+						+			+	+		+			+										+
Meridion circulare	MCIR													12	+			+					+			+			+			+	+		+
Navicula antonii	NANT		+											+			+				+		+			+		+	+		+	5			+	+		4	+	5	18	10	9	3	+
Navicula capitatoradiata	NCPR														5	+	+	+		+	+		+	+	+	+	3	+	+	+	+	5	+	5	+	+	+
Navicula cari	NCAR																+	+																+
Navicula cariocincta	NCCC																																	+		+
Navicula cf. cryptocephala	NcfCRY																																	4
Navicula cf. trivialis	NTRV															+
Navicula cincta	NCCA	67	21	6	22	8	4	4		6	7	+	5		+	3		+	+	5		21	+	+	7	+			+		+			+	+		5			+		+			+
Navicula cryptocephala	NCRY	3		+	9									3	+	+	+	+		+	+			+							+		+	12	+	+	3
Navicula cryptotenella	NCTE													+	+	+		+	+	4	5	+	+	3	+	+	3	3	3	3	9	+	+	+	+	+	+	+	10	+	4	+	+	5	+
Navicula cryptotenelloides	NCTO																	3	+	+	+	6		+					+	+	+		+	+			+	5	12	10	7		20	37	21
Navicula digitoconvergens	NDGC			+	+
Navicula erifuga	NERI			+
Navicula gregaria	NGRE			4			+							+	+	3	3	+		+	+	6	9	+	3	+		6	+		+	3	+	11	+		222			24	23	6	30		+
Navicula hanseatica	NHTI		+	6	3
Navicula ID 7	NID7										4		9
Navicula kefvingensis	NKEF					+	+	+		+	+	3	+
Navicula meulemansii	NMEU						+				5	3	+
Navicula moskalii	NMOK													+									21			141			25			5		+	3
Navicula oblonga	NOBL													+																												+
Navicula peregrina	NPRG					+				6	5	+
Navicula radiosa	NRAD													5	+	+	+									+	+			+	+	+		+	+		+	+	7	14	4	+	+	+	+
Navicula reichardtiana	NRCH													+		28	+	+	+	+	+	+	+	3	+		8	+	+	3	+	+	+	4	+	+	3
Navicula reinhardtii	NREI										+			66	6		27						3			24			+			+			+	+					+
Navicula rhynchotella	NRHT				7									7	+	+	+	+	3	3	+		+	5	3	+	+	18	3	+	4	+	+	4	+	+	3
Navicula salinarum	NSAL	20	7	9	22	4			5	+	3	+	4
Navicula salinicola	NSLC							+								+				+	+	3						5									3
Navicula slesvicensis	NSLE				+							+		+	+	+	+	+		+							+		+			+	+	+	+	+	+
Navicula sp.	NSP																																					+		+			+
Navicula sp. 2	NSP2																																										+
Navicula sp. 3	NSP3																																											+
Navicula sp. 3 pel	NSP3P										4
Navicula sp. 4 DE P52 F 14-22	NSP4														+			+	+			5	+														+
Navicula subalpina	NSBN																																							8		+
Navicula subrhynchocephala	NSRH																																										+	+
Navicula tripunctata	NTPT													34	+	+	+	+			+		+	+	+	+	+		+	6	+		+		3	+	+		+	+	3	+	+	+	+
Navicula trophicatrix	NTCX																																							+	+
Navicula upsaliensis	NUSA													8	+		6				+		+	+		+	+	+	+	+		+	+		+
Navicula veneta	NVEN	66	42	40	41	54	40	141	88	30	181	58	86	55	+	8	7	+	+	8	+	11	11	+	3		+	9	+	+	+	+		6	+		16				+
Navicula wiesneri	NWIE	3	4	9
Navicymbula pusilla	NCPU												+
Neidium affine	NEAF															+																+
Neidium binodis	NBID																																					+	+		+	+		+
Neidium cf. juba	NEcfJU																																	+
Neidium dubium	NEDU													+							+		+			+			+						+
Neidium dubium morf. biconstrictum	NDUC																																						+	+	+	+	3
Nitzschia acicularis	NACI															3			8	+		+
Nitzschia acidoclinata	NACD						6
Nitzschia acuminata	NACM																					+
Nitzschia amphibia	NAMP	+		+							3				3	+		+		+	+		+	+	+	+			+	+	+	+	+	+		8	+
Nitzschia archibaldii	NIAR																																						5	5	7	+	50
Nitzschia calida	NICA																							+						+		+	+		4
Nitzschia clausii	NCLA												+
Nitzschia commutata	NICO		+		+	+	+	3	+	+	4	3	3																													+
Nitzschia dissipata	NDIS														+	+		+		+	+			+		+	+		+						+			3	+	+	17		+
Nitzschia dissipata var. media	NDME												+																									+		113	11	11	24	+	11
Nitzschia frustulum	NIFR	40		9		48	45	33	30	11	43		44							+	+			10			+	6		8	3		6	7	+		+					+	3		+
Nitzschia gisela	NGIS						+	+	+			+	+
Nitzschia graciliformis	NIGF															6	21			+	3	+									3						+
Nitzschia gracilis	NIGR																+		+	16	+	56			6			3			4			+					+	9	7	+
Nitzschia heufleriana	NHEU																																									+
Nitzschia homburgensis	NHOM																									+
Nitzschia inconspicua	NINC	5	8	+		71	34	32	25	21	5	32	29		+	4	3	+		10	+	7		3	7		+	21		+	4			+			11	3	+		12		+	4	+
Nitzschia intermedia	NINT																		3	4		10			11			6										+					+
Nitzschia lacuum	NILA																																										+
Nitzschia liebethruthii	NLBT	6	8		8	22	53	26	29		3	22	+
Nitzschia linearis	NLIN											+		10					7			+						3		+				+			+			10		20		+
Nitzschia macilenta	NMCL																																								+
Nitzschia microcephala	NMIC									+																														+	4		+
Nitzschia nana	HNAN										+	3
Nitzschia palea	NPAL	47	+	4	31	9			4				3		+	+	5		17	14	7	36	+	3	6	3	+	9	+	+	15		+	53	+	+	15			4		+	5	44
Nitzschia paleacea	NPAE															4			+	+	+	+									13			14	+		+		+	7	+		16	+	+
Nitzschia perminuta	NIPM	+		+		44	11	20	+	3	7	9	+						+	+		+													+		+							97
Nitzschia pumila	NPML																		7	13		53			+			3			17			9
Nitzschia recta	NREC														+			+								+	+												+	+	12			+
Nitzschia rectirobusta	NRBU																																									+
Nitzschia rosenstockii	NRST																																					14	4	41	19	3		30	14
Nitzschia scalpelliformis	NISC										+
Nitzschia sigmoidea	NZSG																																	+
Nitzschia sinuata var. delognei	NSDE																																							+				+
Nitzschia solgensis	NSOL																						+
Nitzschia subtilis	NISU															8		+	+										+		5				+
Nitzschia supralitorea	NZSU																					+													+		3
Nitzschia tabellaria	NTAB																			+																		+	+		5	+	+	+
Nitzschia tenuis	NITE															+				4		8			15	+	11	31
Nitzschia tubicola	NTUB			+		28	24	21	58		3	3	4
Nitzschia umbonata	NUMB											+				+													+
Nitzschia valdestriata	NIVA																																					7	+	5	4		3	12	+
Nitzschia vermicularis	NVER															3			+
Nitzschia vitrea var. salinarum	NVSA					+	11	23	4	5	3	7	+
Nitzschia vitrea var. vitrea	NIVI											+	+																										+
Nitzschia subacicularis	NSUA																																	9
Nupela cf. silvahercynia	NcfSHC										9
Pantocsekiella ocellata	POCL																			+																		42	191	9	80	+	111	32	4
Pantocsekiella pseudocomensis	PPCS																																					51	28	9	17	+	60	30	+
Pinnularia bertrandii	PBTD				+	+		+	+	+	+																					+
Pinnularia brebissonii	PBRE					+	+	+	3	+		+			+			+								+			+			+		+
Pinnularia neomajor var. frequentis	PNFR															3				+					+	+	+		+		+	+		+
Pinnularia rhomboelliptica var. inflata	PRHI													+								+				+								+
Pinnularia viridiformis	PVIF													+											+
Pinnularia lundii	PLUN																																					+		+	8	+
Placoneis anglica	PAGC																																										+
Placoneis cf. clementispronina	PcfDMT																																					+	+	+	+		+	+	+
Placoneis nanoclementis	PNCL																																							7	84	19	5	+	+
Placoneis pseudoanglica	PPAN																																								10
Placoneis sp. 1 (cf. placentula)	PcfPLC																																											+
Planothidium delicatulum	PTDE	+	+	+	+	5	+	3	+	21		24	26							+				+
Planothidium dubium	PTDU																		+														+
Planothidium engelbrechtii	PLEN										+
Planothidium frequentissimum	PLFQ	9	45		24	3	+		3	5	9	6	23	14	+	5	5	+		5	+	+	+	+	+	4	+		7	+	+	+	+	+	+	+	+	+
Planothidium lanceolatum	PTLA				+
Planothidium minutissimum	PLMN																																					17	+	7	5	3	8	8
Planothidium pericavum	PPCV				+			3	+		4		3
Planothidium rostratum	PRST																				+			+					+	+		+	3		+	+
Platessa conspicua	PTCO														3	+	+	3		+	+	+		+	+					+			3	+		+			+
Pleurosigma sp. 1	PLSP1										+		+
Prestauroneis protracta	PPRT				+							+	+	4	+								3			38			+			3			+							+	+	+
Prestauroneis protractoides	PPRD																																									+
Prestauroneis tumida	PTUD																																					+	+	+	3	+	+	+
Psammothidium bioretii	PBIO																																					6				+	+	+
Psammothidium subatomoides	PSAT																																					+
Rhoicosphenia abbreviata	RABB													+	5	+	+	+			3		+	+		4	3		+	+	+	+	+		+										+
Rhopalodia acuminata	RACU									+		+
Rhopalodia brebissonii	RBRE							+		+	+	+
Rhopalodia constricta	RCON									+
Rhopalodia gibba	RGIB																																					+	+	4	+		+	+
Rhopalodia gibberula	RGBL										+
Rhopalodia parallela	RPAR																																					+	37	34	4	+	+	+	+
Sellaphora bacillum	SEBA													+	+			+					+			+		+				+			+
Sellaphora cf. joubaudii	ScfJOU	+
Sellaphora pupula	SPUP																			+						+				+	+			+
Sellaphora pupula "grooved lanceolate"	SPUP-g																																							+
Sellaphora pupula 'spike'	SPUP-s																																						+	+			3	5
Sellaphora pupula var. densistriata	SEPD																																					+	+		+			+
Sellaphora sp. 1	SSP1																																											+
Stauroneis cf. obtusa	ScfOBT																						+			+									+
Stauroneis leguminopsis	SLGF							+			+
Staurosira brevistriata	SBRV														+			+			+			+			+			2	+	+	+		+	7		11	7	+	4	+	6	9	+
Staurosira venter	SSVE	+
Staurosirella pinnata	SRPI	+								7					+					+	+			+			+						+			+		+	+		+	+	+	+
Stephanodiscus binatus	SBNT													18	48	47	25	4	19	5	7	9	73	18	44	34	25	76	21	7	13	20	19	3	32	3
Stephanodiscus hantzschii	SHAN			+	+									7	23	162	18	+	30	83	21	22	6	15	45	46	5	15	10	3	34	110	21	218	61	10	161	+
Stephanodiscus medius	SMED																																					4	+	+	+	3
Stephanodiscus parvus	SPAV	+	+	7											+	13	4	+	115	22	43	10	10	4	20	+	+	12			3		11		42	4	3
Surirella amphioxis	SAPH																															+
Surirella angusta	SANG																									+	+
Surirella brebissonii	SBRE	+				6		+	3	3		+	+									+														+				+		+
Surirella brebissonii var. kuetzingii	SBKU						+
Surirella minuta	SUMI																														+
Surirella ovalis	SOVI									+		+		+		+							+
Surirella parahelvetica	SUPH																																							+	+
Surirella splendida	SSPL																											+
Surirella striatula	SSTR												+
Surirella subsalsa	SSSA					4		+	+	+	5	+	+
Surirella venusta	SVEN												+
Tabularia fasciculata	TFAS	4	+		+	+	+	+	+	24	4	72			+								+	+		+			+	+				+				+	+		+	+		+	+
Tabularia tabulata	TTAB												+																										+
Thalassiosira duostra	TDUO																		7	+	+	7	+	+	+		+	+	+	+	+	+	3	+		+
Tryblionella angustata	TANG																																							+	+	+		+
Tryblionella constricta	TRCO			+				+			+	+										+	+									4								+	+	+
Tryblionella debilis	TDEB	+				4	7	22	9	4	4	6	3	+		+		+											+		+									+				+
Tryblionella hantzschiana	THAZ
Tryblionella hungarica	THUN													+	+	3		+	6	3		+			+	+	+	+	+		6	+		3	+		+		+			+
Ulnaria acus	UACU														11	13	+	3	10	4	23	3	+	5	244	5	23	134		+	13	+	15	9	7	8	10
Ulnaria ulna	UULN													8	12	+	+	+			+		+	+		5	4		+	+	+	+		+	+	+	+	+	+	3	+	+		+	+
Parameter	Unit	Values
pH		9.55	8.83	8.53	7.82	N/A	N/A	N/A	6.4	6.6	6.8	6.78	7.99	8.23	8.32	8.7	8.26	8.45	8.48	7.89	7.86	8.25	7.86	8.05	7.47	8.55	8.6	8.8	8.19	8.25	8.55	8.66	8.45	8.48	7.86	7.5	7.81	8.32	8.15	7.85	7.99	8.26	8.13	8.01	8.2
Conductivity	µS cm-1	5150	3858	2645	2930	N/A	N/A	N/A	5170	9230	6376	6740	4450	865	836	732	748	754.2	732	657	558	553	766	716	778	712	625	472	825	787	715	649	754.2	754	723.5	792	706	556	734	650	711.2	570	505	591	669
T	ᵒc	17.3	1.1	3.2	6.8	N/A	N/A	N/A	7.8	13.9	8.5	7.2	6.8	8.8	8.5	8.7	21.3	20.9	21.6	15	16.1	15.2	1.6	0.6	2.2	10.2	10.1	10.3	20.6	21.1	4.8	5.9	6.2	5.1	5.5	5.2	5.7	8.8	21	10.3	5.3	8.8	22.7	9.8	4.7
HCO3-	mg L-1	283.7	451.4	320.3	353.8	N/A	N/A	N/A	610	405.7	344.7	405.7	744.2	286.7	274.5	280.6	N/A	N/A	N/A	210.5	203	183	274.5	216.6	289.8	338.6	167.8	234.9	234.9	192.2	219.6	N/A	N/A	N/A	216.6	204.4	241	247.1	173.9	302	247.1	369.1	253.2	297.4	269.3
CO2[HCO3-]	mg L-1	102.3	162.8	111.5	127.6	N/A	N/A	N/A	220	146.3	124.3	146.3	268.4	103.4	99	101.2	N/A	N/A	N/A	75.9	72.1	66	99	78.1	104.5	122.1	60.5	84.7	84.7	69.3	79.2	N/A	N/A	N/A	78.1	73.7	86.9	89.1	62.7	108.9	89.1	133.1	91.3	99.4	92.1
Cl-	mg L-1	1524.3	912	1090.1	685	N/A	N/A	N/A	1006	2782.5	2359.4	2976	1585	57.4	59.9	74.3	N/A	N/A	N/A	77.4	69.3	67.8	82.2	71.1	105.5	77.9	92.5	72.9	92.8	82.3	83.3	N/A	N/A	N/A	78.1	83.8	67.1	51.8	46.1	43.6	41.9	47.1	41.8	45.7	41.2
NNH4	mg L-1	0.021	0	0.046	0.357	N/A	N/A	N/A	0.15	0.101	0.046	0.021	1.626	0.163	0.112	0.055	N/A	N/A	N/A	0.22	0.53	0.617	0.705	0.356	1.158	0.024	0.027	0	0.027	0.215	0.053	N/A	N/A	N/A	0.153	0.296	0.039	0.041	0	0.028	0.006	0	0.067	0.029	0
NH4+	mg L-1	0.026	0	0.059	0.459	N/A	N/A	N/A	0.193	0.13	0.6	0.026	2.094	0.21	0.144	0.071	N/A	N/A	N/A	0.283	0.54	0.795	0.547	0.277	0.899	0.031	0.034	0	0.034	0.277	0.068	N/A	N/A	N/A	0.198	0.382	0.05	0.053	0	0.036	0.007	0	0.087	0.02	0
PO43-	mg L-1	1.474	4.521	0.854	9.1	N/A	N/A	N/A	8.565	0.79	0.596	1.09	12.46	0.353	0.463	0.341	N/A	N/A	N/A	0.303	0.35	0.311	0.527	0.546	0.566	0.368	0.459	0.356	0.379	0.566	0.36	N/A	N/A	N/A	0.223	0.052	0.09	0.269	0.451	0.364	0.345	0.296	0.368	0.335	0.312
PPO4	mg L-1	0.486	1.492	0.282	3	N/A	N/A	N/A	2.825	0.261	0.197	0.36	4.11	0.116	0.153	0.113	N/A	N/A	N/A	0.1	0.1	0.103	0.174	0.18	0.187	0.121	0.151	0.118	0.125	0.187	0.119	N/A	N/A	N/A	0.074	0.017	0.03	0.089	0.149	0.12	0.134	0.098	0.121	0.123	0.112
SO42-	mg L-1	196.9	150.6	189.9	166.2	N/A	N/A	N/A	165	191.1	198.3	176.1	187.6	122.2	122.4	71	N/A	N/A	N/A	70.51	66.8	62.92	71.4	84.1	68.5	146.9	112.3	66.9	137.2	99.8	90.1	N/A	N/A	N/A	94.8	122.4	90.7	147.3	130.6	117.7	113.5	118.1	126.7	121.6	110.3
SSO4	mg L-1	65.7	50.3	63.4	55.5	N/A	N/A	N/A	55.1	63.8	66.2	58.8	62.6	40.8	40.8	23.7	N/A	N/A	N/A	23.5	22.3	21	23.8	28.1	22.9	49	37.5	22.3	45.8	33.3	30.1	N/A	N/A	N/A	31.6	40.8	30.3	49.2	43.6	39.3	37.9	39.4	42.3	41.5	38.5
COLOR	mgPt dm-3	80	120	50	60	N/A	N/A	N/A	140	40	100	25	160	10	10	16	N/A	N/A	N/A	60	60	60	30	50	50	20	9	25	30	20	24	N/A	N/A	N/A	10	14	12	4	8	10	4	8	4	6	4
Mn3+	mg L-1	0.03	0.25	0.13	0.1	N/A	N/A	N/A	0.14	0.28	0.17	0.47	0.51	0.01	0.01	0.01	N/A	N/A	N/A	0.04	0.02	0.01	0.05	0.02	0.07	0.01	0.01	0.02	0.02	0.02	0.02	N/A	N/A	N/A	0	0.03	0.02	0.01	0.01	0	0	0	0	0	0
Fe2+/3+	mg L-1	0.24	0.05	0.05	0.11	N/A	N/A	N/A	0.25	0.33	0.3	0.253	0.41	0.04	0.02	0.02	N/A	N/A	N/A	0.03	0.01	0.01	0.27	0.04	0.07	0.04	0	0.03	0.07	0.13	0.01	N/A	N/A	N/A	0.06	0.02	0.02	0.01	0.03	0.09	0.02	0.01	0.01	0.01	0.01
Mg2+	mg L-1	37	34	31.9	25.6	N/A	N/A	N/A	35.9	48.7	39.5	48.1	43.8	19.1	18.3	15.3	N/A	N/A	N/A	12.6	10.3	9.5	13.3	14.5	11.4	18.9	16.4	14.9	15.6	15.1	13.6	N/A	N/A	N/A	11.6	16	10.5	15.7	11.9	11.9	11.6	10.1	9.6	11.3	11.1
Ca2+	mg L-1	139.8	138.3	130.6	75.8	N/A	N/A	N/A	165	216.2	171.7	211.7	181.3	104.5	98.1	66.2	N/A	N/A	N/A	66.7	61.2	52.6	82.5	75	86.4	143.6	117.6	65.7	78.6	63.3	58	N/A	N/A	N/A	58	59.5	64.1	117.6	78.6	77.7	79.2	91.3	84.4	79.6	82.1
Na+	mg L-1	681.8	401.8	462.6	277.3	N/A	N/A	N/A	453.3	1443.7	1537.4	1426.7	500.7	15.6	20.3	27.7	N/A	N/A	N/A	30.9	28	22	29.5	21.5	34	30.3	28.5	32.8	38.7	29.2	42.4	N/A	N/A	N/A	40.4	42.4	38.8	29.8	25.6	35.2	43.1	24.7	24	39.6	38.6
K+	mg L-1	58.6	68.8	67.6	59	N/A	N/A	N/A	109.8	8.5	14.8	21.5	124.8	7	7.7	7.8	N/A	N/A	N/A	8.4	9.3	10.5	8.9	8.2	10.7	9.5	8.5	8.3	5.1	5.2	6	N/A	N/A	N/A	4.5	5.1	5.6	3.6	1.7	1.6	1.9	0.09	0.8	1.2	1.4
