# Supplementary material for: Critical multi-stranded approach for determining the ecological values of diatoms in unique aquatic ecosystems of anthropogenic origin
Source: PeerJ journal article supplement (doi:10.7717/peerj.8117), 2019-12-05

### PE

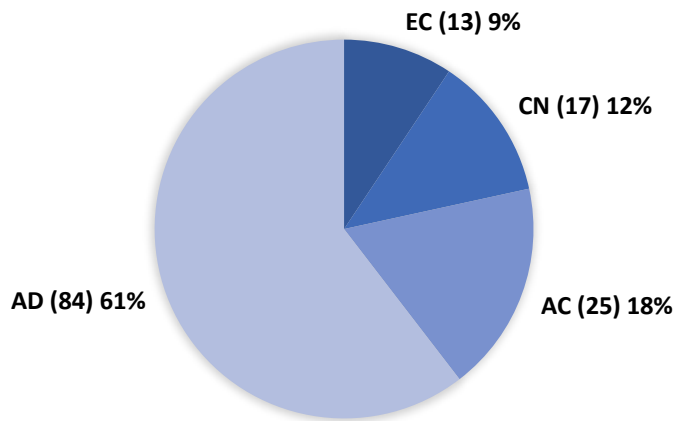

### LE

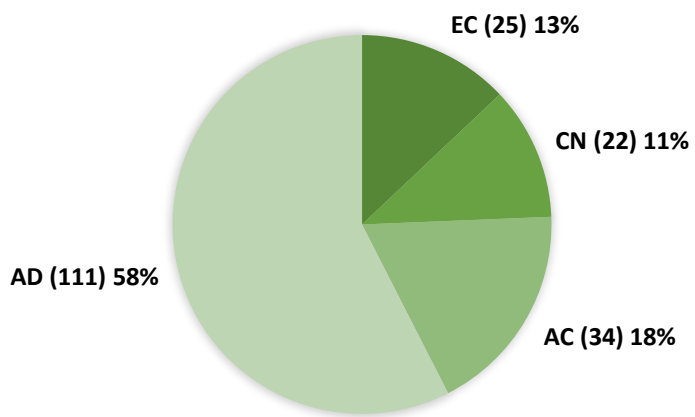

### BO

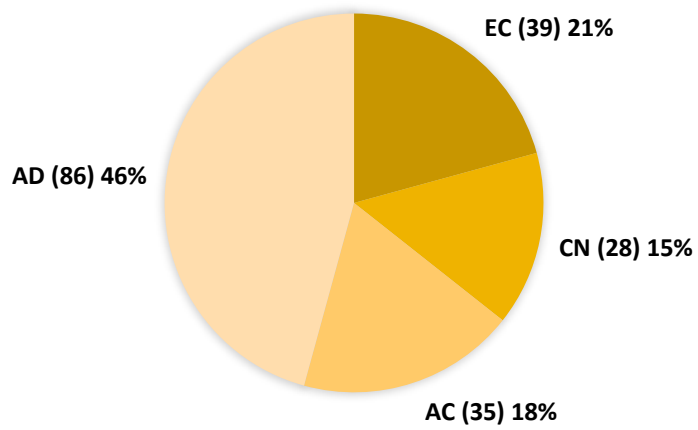

Supplement: Supplemental_Figure_S1.pdf [file Supplemental_Figure_S1.pdf]
