# Supplementary material for: Critical multi-stranded approach for determining the ecological values of diatoms in unique aquatic ecosystems of anthropogenic origin
Source: PeerJ journal article supplement (doi:10.7717/peerj.8117), 2019-12-05

### pH requirements

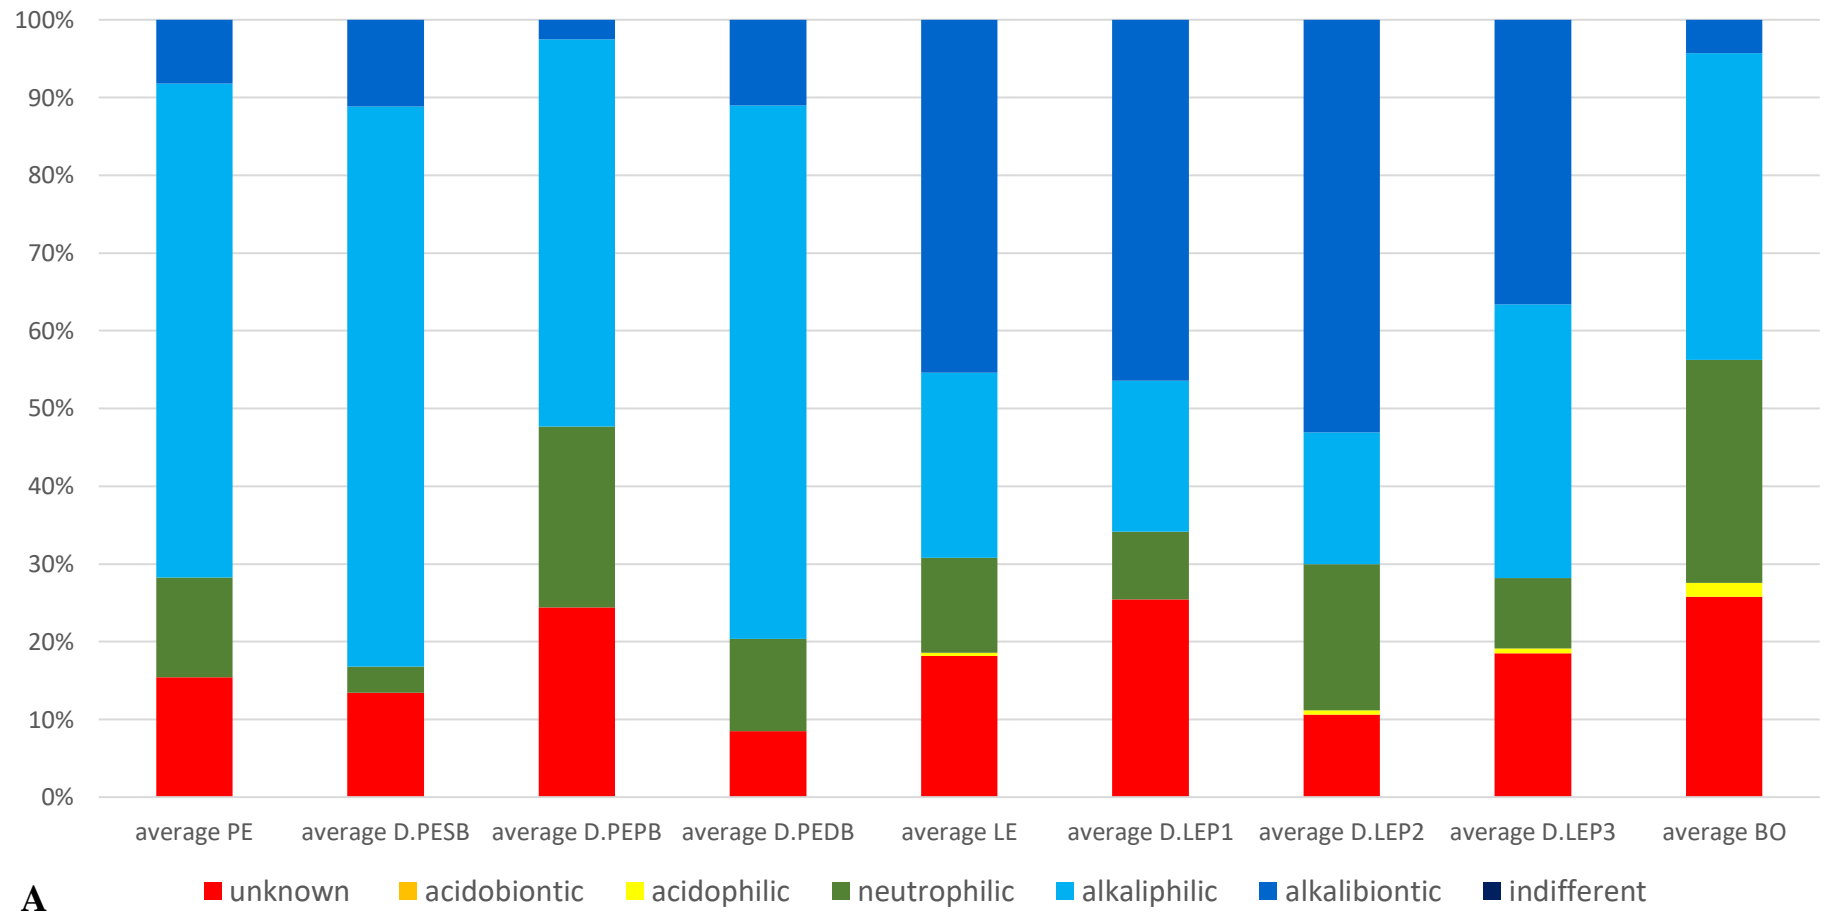

# Salinity

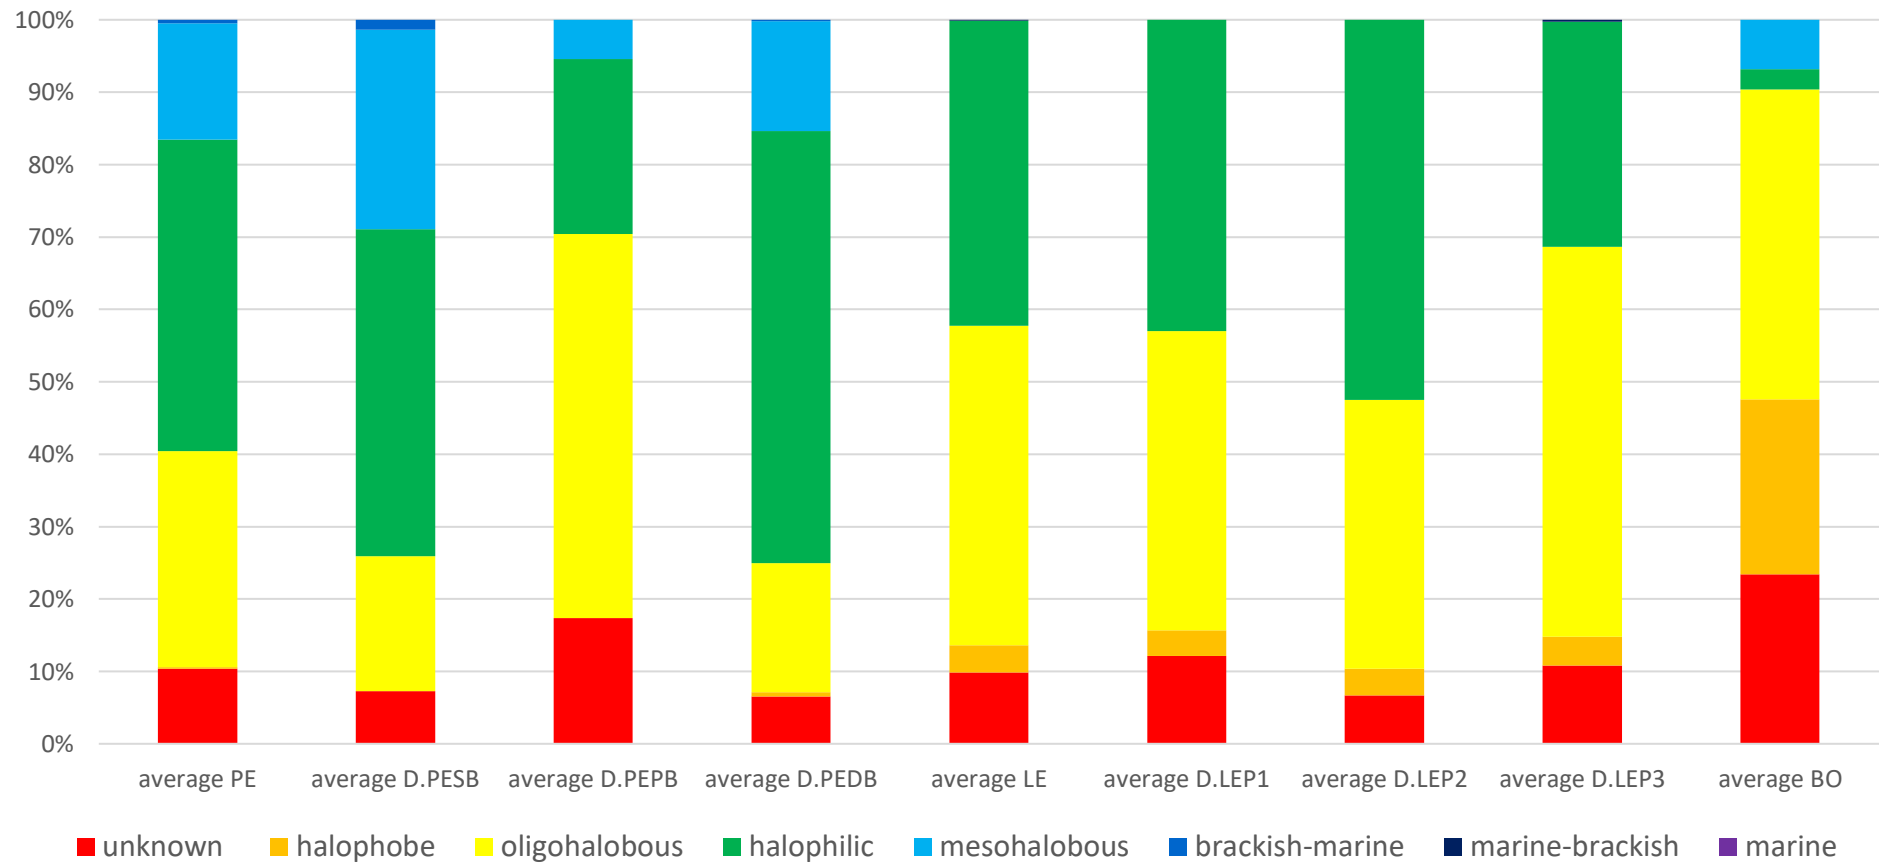

**B**

### Nitrogen uptake

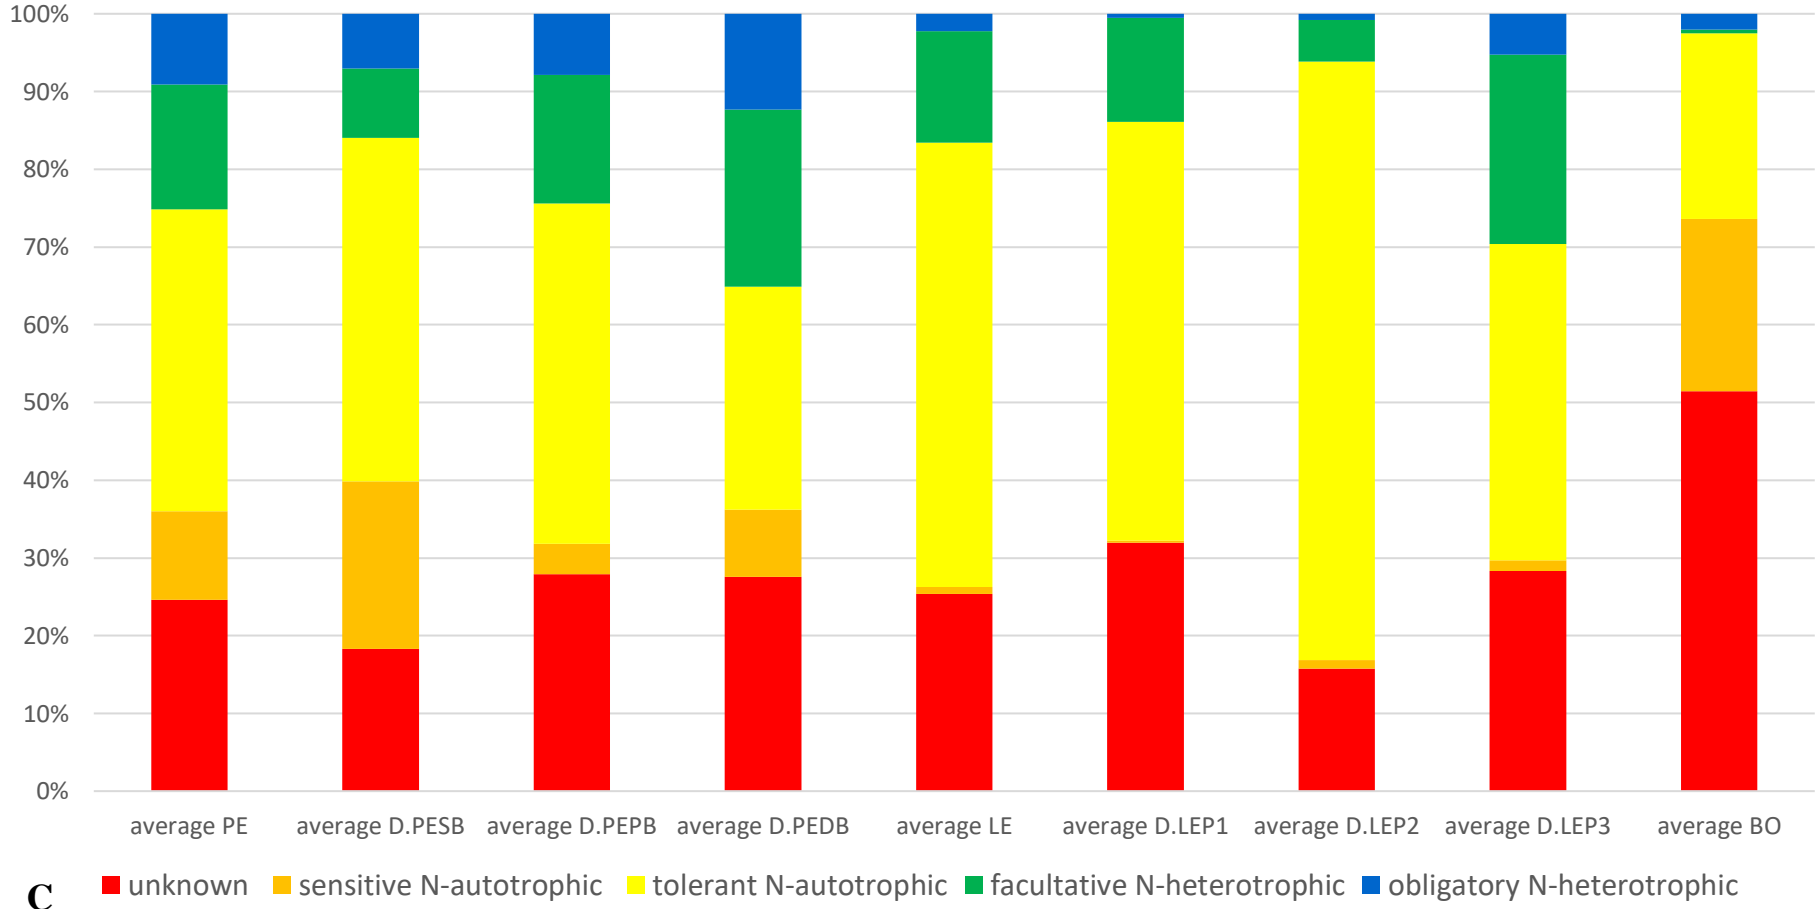

### Oxygen requirements

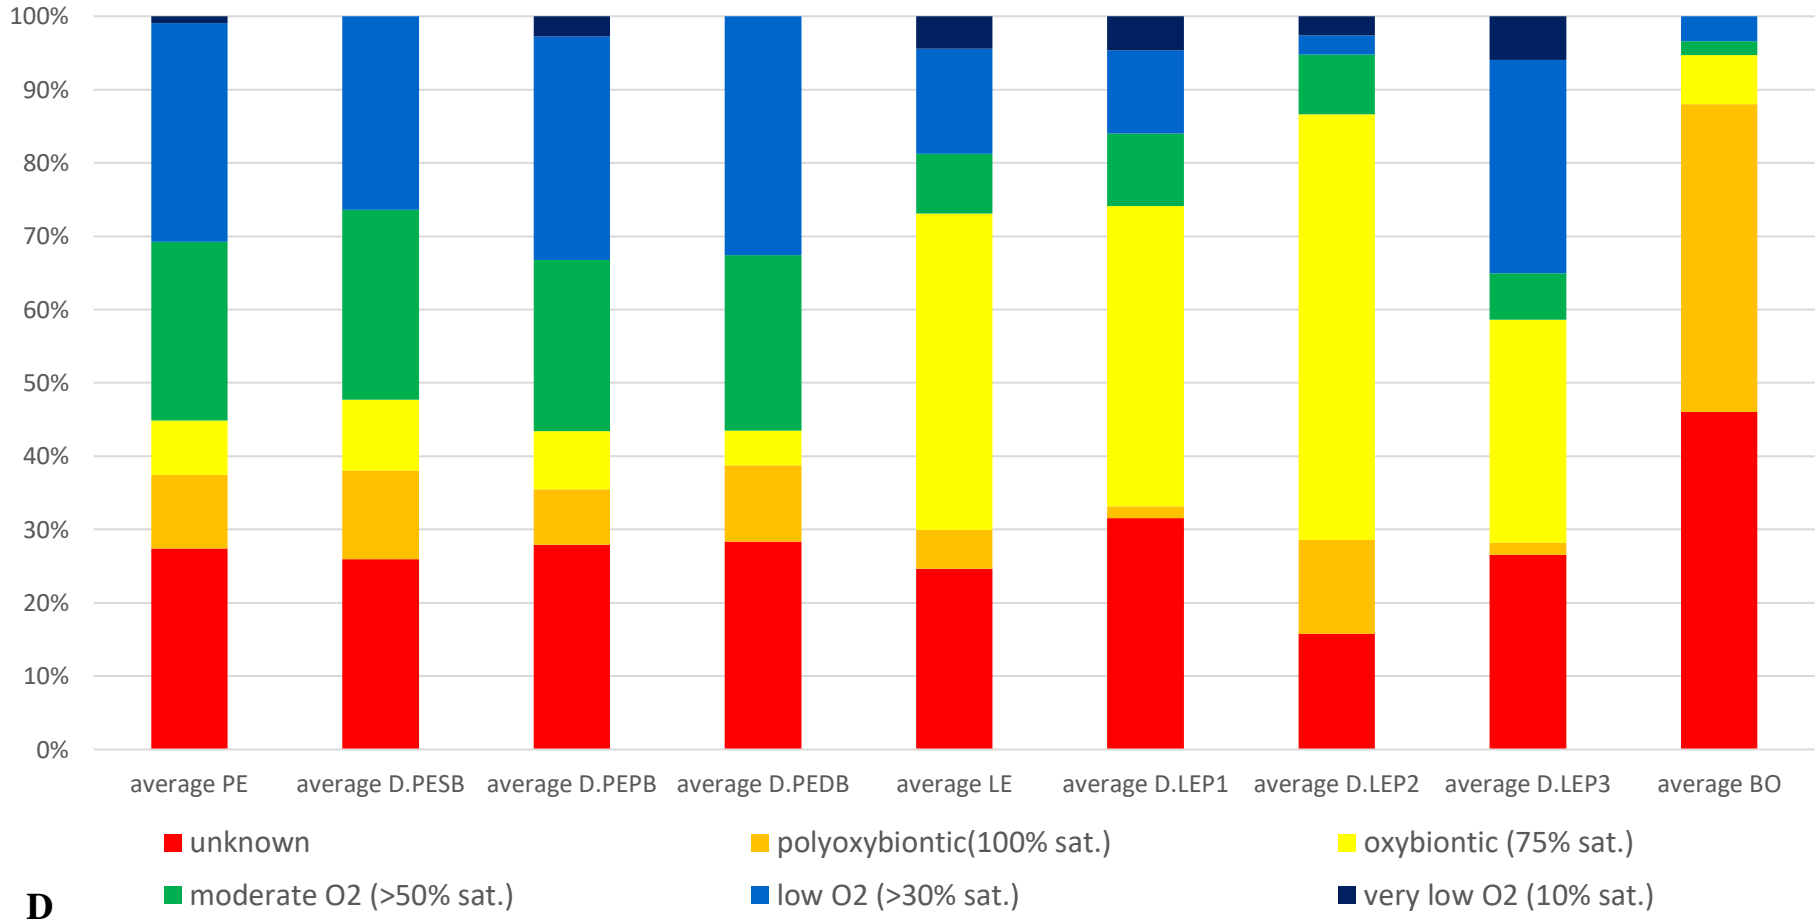

**D**

### Saprobity

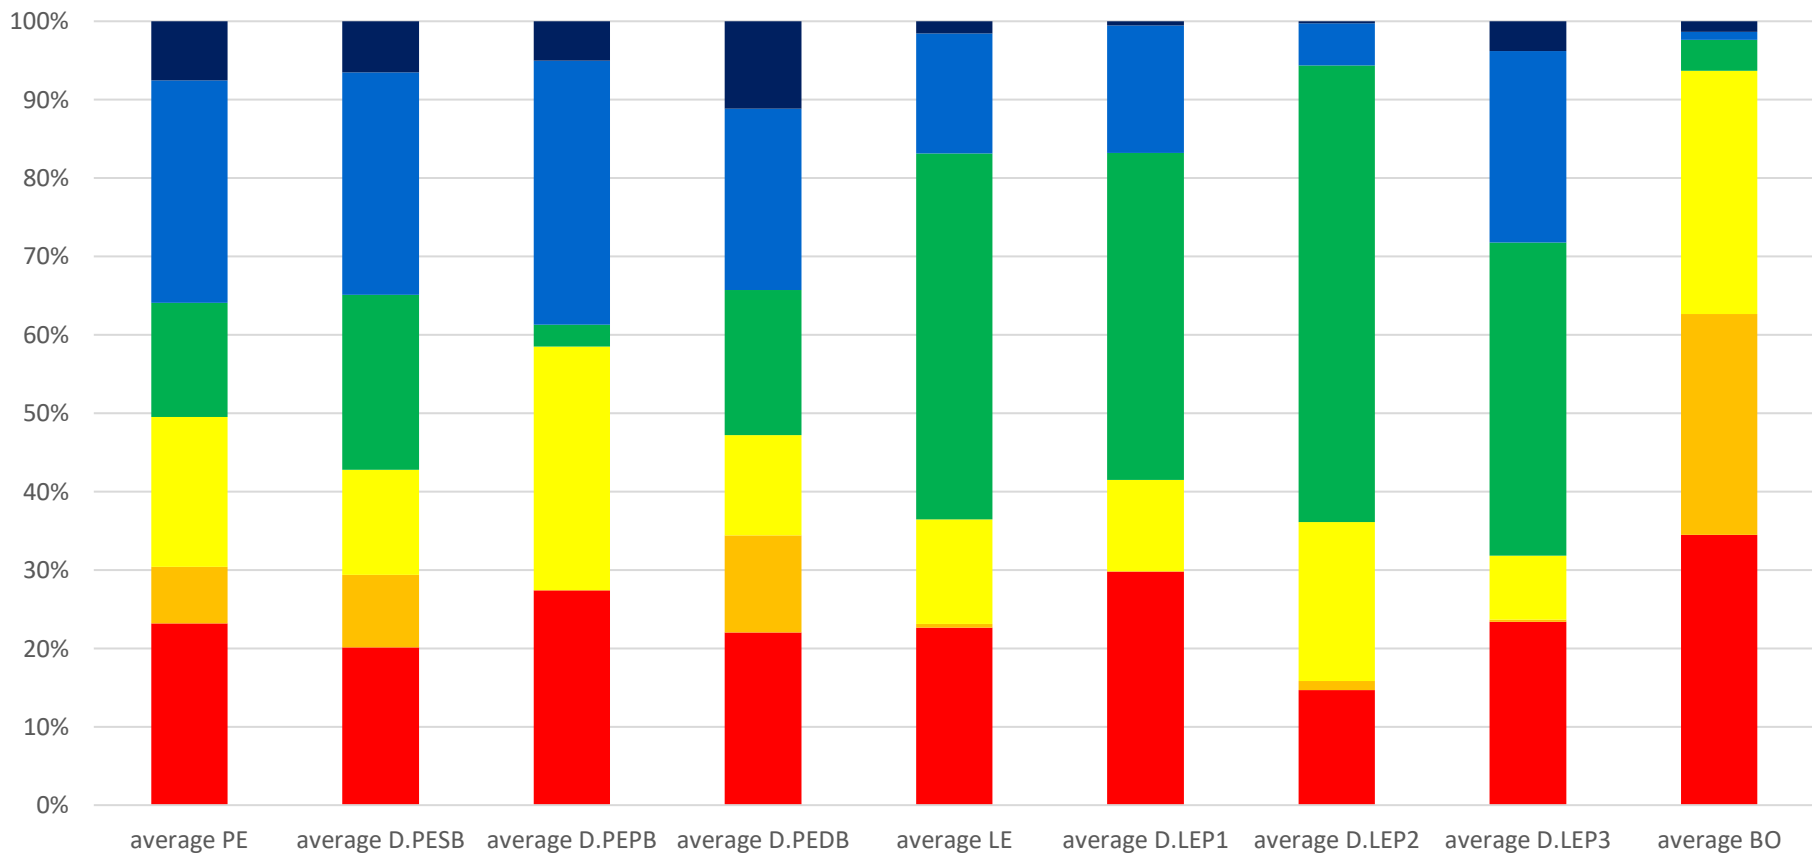

**E**

■ unknown   
 ■ oligosaprobe   
 ■ β-mesosaprobe   
 ■ α-mesosaprobe   
 ■ α-meso -> polysaprobe   
 ■ polysaprobe

Trophic state

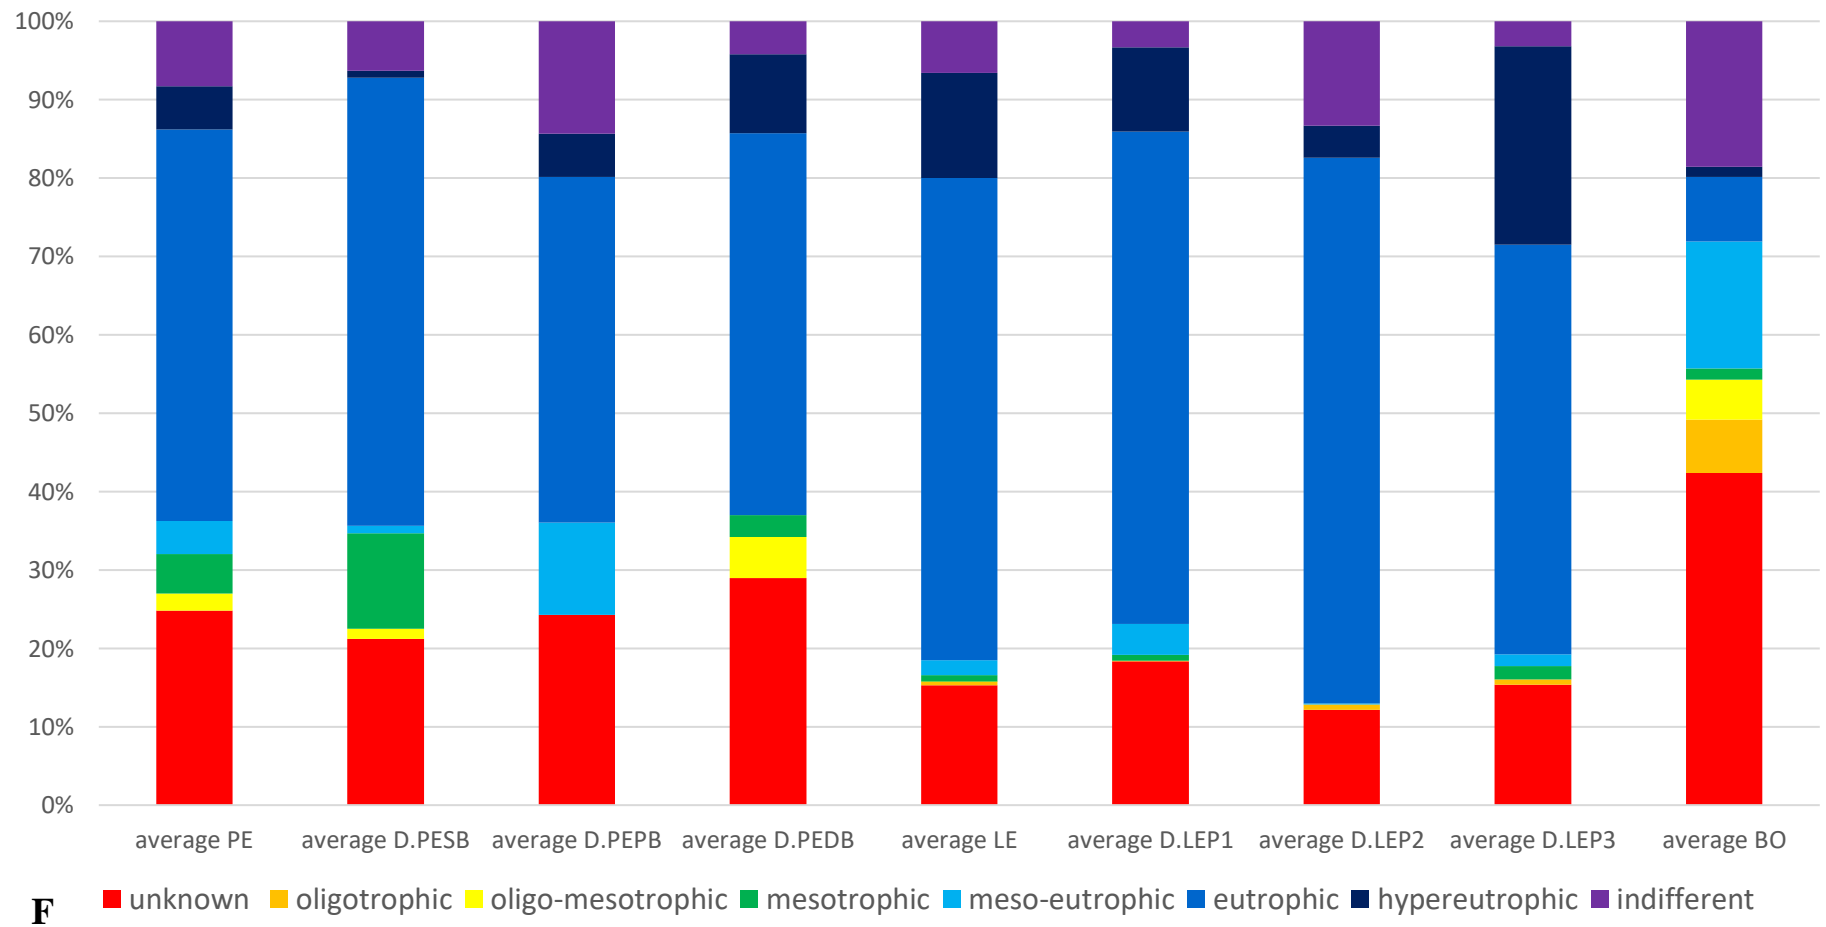

### Moisture aerophily

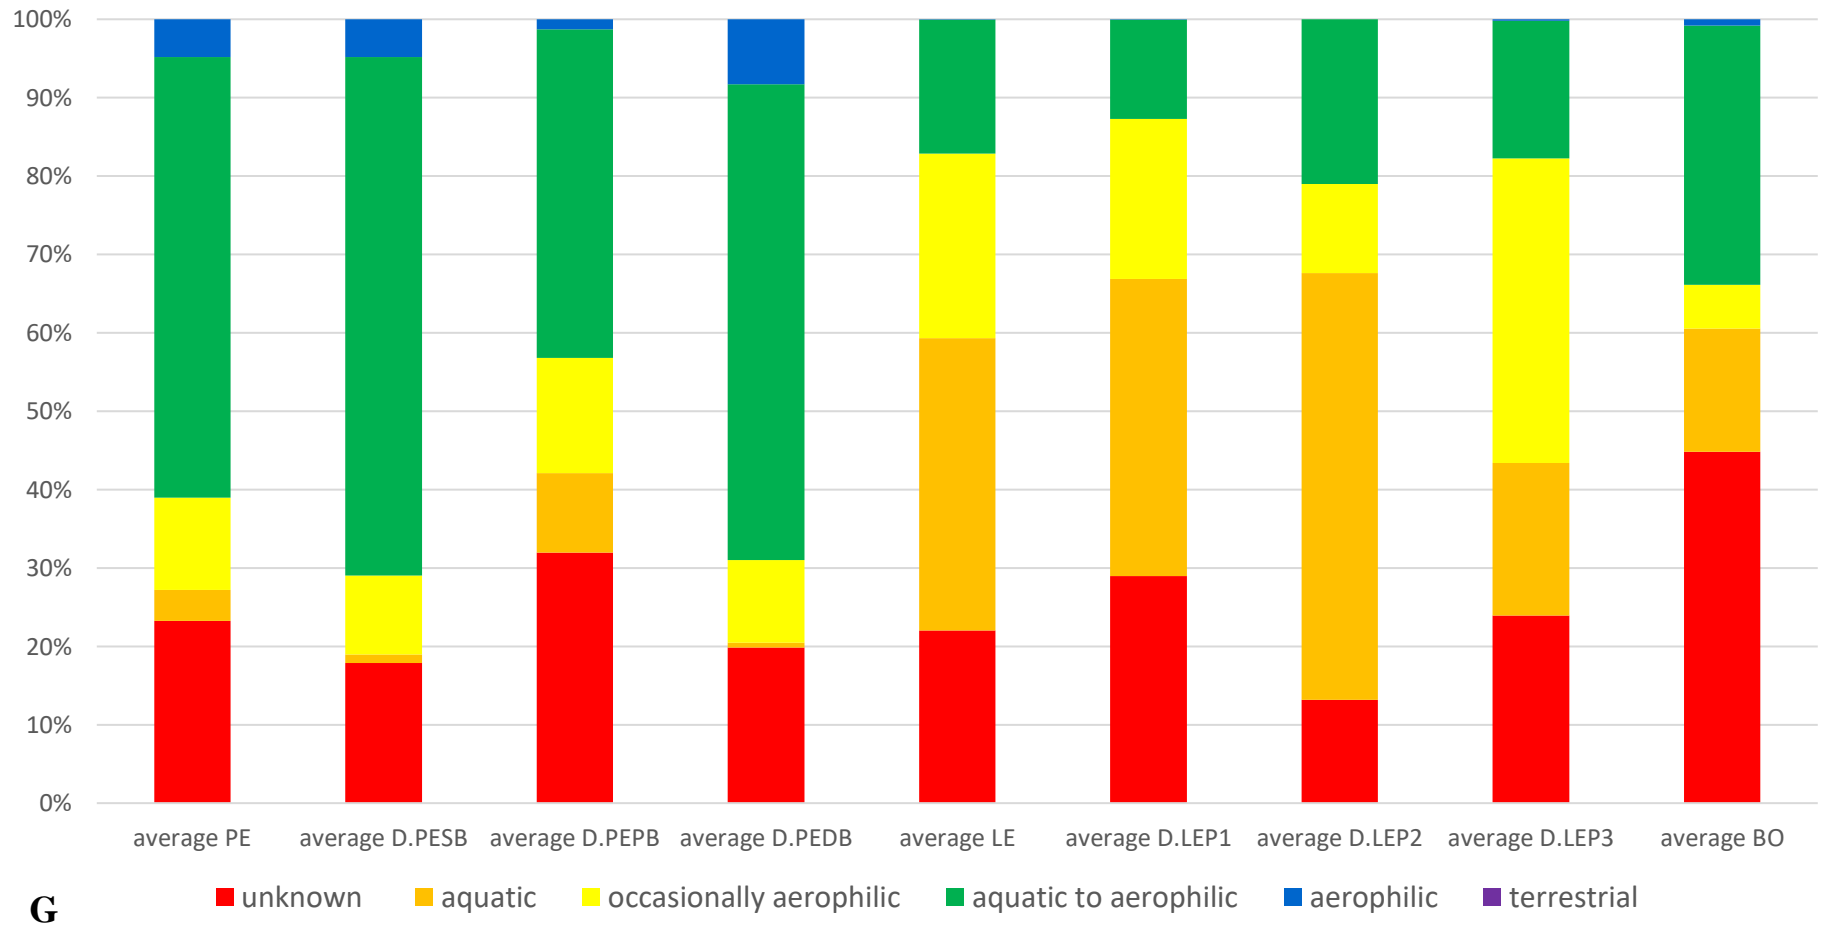

Supplement: Supplemental_Figure_S2.pdf [file Supplemental_Figure_S2.pdf]
